# Supplementary material
Source: Springer Nature journal article supplement (https://www.springermedizin.de/resource/supplementary/12958_2013_1162_MOESM2_ESM.pdf/9566678)
Supplement: MOESM2 [file 9566678]

**RayBio® Human Protein Array**  
**Positive Control Normalization without**  
**Background**

|                               | <b>PIF</b> | <b>HIS-tag</b> |
|-------------------------------|------------|----------------|
| <b>Positive Control</b>       | 1,347,376  | 1,347,376      |
| Neg                           | 3          | 9              |
| 4-IBBL                        | 75         | 50             |
| 4-IBBR                        | 11         | 1              |
| Acrp30                        | 15         | 53,640         |
| Activin A                     | 16         | 47             |
| ALCAM                         | 16         | 53,505         |
| Angiogenin                    | 7          | 1              |
| Angiopoietin-1                | 8          | 24,580         |
| Angiopoietin-2                | 81         | 31,403         |
| Angiostatin                   | 1          | 7,159          |
| <b>AR (Amphiregulin)</b>      | 2          | 1              |
| ART                           | 14         | 6,490          |
| AXL                           | 5          | 53,397         |
| b NGF                         | 189        | 82             |
| <b>B7-1 (CD 80)</b>           | 11         | 18,842         |
| BCAM                          | 9          | 40,689         |
| BDNF                          | 2          | 1              |
| BLC                           | 6          | 6              |
| <b>BMP-4</b>                  | 17         | 423            |
| <b>BMP-5</b>                  | 2          | 7              |
| <b>BMP-6</b>                  | 7          | 15             |
| <b>BMP-7</b>                  | 5          | 4              |
| BTC                           | 5          | 1              |
| <b>Cardiotrophin-1 (CT-1)</b> | 10         | 13             |
| Cathepsin S                   | 9          | 7,370          |
| <b>CCL21 / 6Ckine</b>         | 8          | 29             |
| CD14                          | 9          | 97             |
| CD27                          | 5          | 53,660         |
| CD30                          | 22         | 53,540         |
| CD40                          | 6          | 53,608         |
| CD40 Ligand                   | 15         | 129            |
| <b>CK beta 8-1 / CCL23</b>    | 61         | 18             |
| CNTF                          | 4          | 1              |
| <b>Complement Factor D</b>    | 622        | 53,610         |
| C-peptide                     | 28         | 1              |
| CTACK                         | 88         | 846            |
| CTLA-4                        | 46         | 51,528         |
| <b>CXCL-16</b>                | 75         | 43,529         |
| DAN                           | 24         | 89             |
| <b>DKK-1</b>                  | 31         | 4,788          |
| <b>DKK-4</b>                  | 75         | 4,095          |
| <b>DR 6</b>                   | 34         | 265            |
| Dtk                           | 9          | 53,500         |
| <b>E-Cadherin</b>             | 3          | 53,600         |
| EGF                           | 12         | 199            |
| EGF-R                         | 7          | 7              |
| ENA-78                        | 5          | 1              |
| Endoglin                      | 3          | 23             |
| Endostatin                    | 6          | 22             |
| Eotaxin                       | 2          | 1              |
| Eotaxin-2                     | 2          | 2              |
| Eotaxin-3                     | 13         | 94             |

|                            |    |        |
|----------------------------|----|--------|
| ErbB3                      | 16 | 53,681 |
| Erythropoietin R           | 1  | 8      |
| E-selectin                 | 22 | 44     |
| Fas                        | 6  | 2,376  |
| Fas Ligand                 | 4  | 59     |
| Fc Gamma RII B/C (CD32b/c) | 15 | 53,495 |
| FGF-4                      | 1  | 15     |
| FGF-6                      | 9  | 1      |
| FGF-7                      | 6  | 1      |
| FGF-9                      | 33 | 48     |
| FGF-b                      | 9  | 5      |
| FIT-3 Ligand               | 7  | 1      |
| Follistatin                | 4  | 15     |
| Fractalkine                | 2  | 6      |
| GCP-2                      | 6  | 29     |
| GCSF                       | 4  | 3      |
| GDNF                       | 5  | 102    |
| GH                         | 15 | 10     |
| GITR                       | 6  | 184    |
| GITR Ligand                | 9  | 20,933 |
| GLP-1 (Glucagon Like)      | 3  | 5      |
| GM-CSF                     | 7  | 16     |
| gp130                      | 9  | 53,655 |
| GRO-a                      | 15 | 18     |
| GRO-b                      | 3  | 5      |
| GRO-r                      | 6  | 9      |
| HB-EGF                     | 15 | 36     |
| HCC-4                      | 10 | 25     |
| HGF                        | 90 | 132    |
| HVEM                       | 21 | 53,607 |
| I-309                      | 6  | 1      |
| ICAM-1                     | 5  | 1      |
| ICAM-2                     | 7  | 12,592 |
| ICAM-3                     | 11 | 53,589 |
| IFN-gamma                  | 6  | 79     |
| IGF-1R                     | 19 | 43     |
| IGFBP-1                    | 2  | 1      |
| IGFBP-2                    | 2  | 1      |
| IGFBP-3                    | 3  | 1      |
| IGFBP-4                    | 1  | 1      |
| IGFBP-6                    | 6  | 3      |
| IGF-I                      | 9  | 23     |
| IGF-II                     | 2  | 27     |
| IL-1a                      | 10 | 1,484  |
| IL-1b                      | 9  | 27     |
| IL-1ra                     | 3  | 33     |
| IL-1RI                     | 7  | 18     |
| IL-1RII                    | 2  | 16     |
| IL-2                       | 4  | 19     |
| IL-2R alpha                | 2  | 63     |
| IL-2R beta                 | 12 | 884    |
| IL-2R gamma                | 1  | 9      |
| IL-3                       | 5  | 18     |
| IL-4                       | 1  | 3      |
| IL-5                       | 4  | 2      |
| IL-5 R alpha               | 1  | 341    |
| IL-6                       | 2  | 1      |

|                     |        |        |
|---------------------|--------|--------|
| IL-6 sR             | 30     | 28     |
| IL-7                | 20     | 22     |
| IL-8                | 7      | 1      |
| IL-9                | 12     | 1      |
| IL-9 R              | 10     | 22,881 |
| IL-10               | 7      | 35     |
| IL-10 R alpha       | 19     | 6,234  |
| IL-10 R beta        | 9      | 53,578 |
| IL-11               | 6      | 111    |
| IL-12p40            | 1      | 2,250  |
| IL-12p70            | 1      | 23     |
| IL-13               | 16     | 42     |
| IL-13 Ra1           | 5      | 53,671 |
| IL-13 Ra2           | 22     | 53,651 |
| IL-15               | 3      | 22     |
| IL-16               | 7      | 4      |
| IL-17               | 6      | 69     |
| IL-17B              | 5      | 1      |
| IL-17C              | 9      | 1      |
| IL-18 BPa           | 8      | 153    |
| IL-18 R alpha       | 7      | 34     |
| IL-18 R beta        | 15     | 151    |
| IL-21R              | 11     | 46     |
| IL-28A / IFN-lambda | 9      | 53,469 |
| Insulin             | 2      | 6      |
| Insulin-Receptor    | 9      | 4,012  |
| IP-10               | 68     | 55     |
| I-TAC               | 19     | 85     |
| LAP                 | 10     | 4      |
| Leptin (OB)         | 52     | 1,172  |
| Leptin R            | 7      | 11,110 |
| LIF                 | 1      | 14     |
| Light               | 24     | 2,008  |
| L-selectin          | 4      | 1      |
| Lymphotactin        | 4      | 1      |
| MCP-1               | 1      | 163    |
| MCP-2               | 7      | 1      |
| MCP-3               | 12     | 56     |
| MCP-4               | 5      | 1      |
| M-CSF               | 9      | 14     |
| M-CSF R             | 5      | 23,009 |
| MDC                 | 8      | 28     |
| MEC (CCL-28 / VIC)  | 15     | 836    |
| MICA                | 29     | 146    |
| MICB                | 17     | 91     |
| MIF                 | 25     | 18     |
| MIG                 | 3      | 7      |
| MIP-1a              | 5      | 17     |
| MIP-1b              | 1      | 1      |
| MIP-1d              | 65,279 | 53,169 |
| MIP-3a              | 139    | 166    |
| MIP-3b              | 121    | 16     |
| MMP-1               | 263    | 352    |
| MMP-2               | 86     | 37     |
| MMP-3               | 1      | 10     |
| MMP-8               | 1      | 1      |
| MMP-9               | 4      | 1      |

|                           |        |        |
|---------------------------|--------|--------|
| MMP-10                    | 6      | 28     |
| MMP-13                    | 1      | 25     |
| MPIF-1                    | 8      | 88     |
| MSP                       | 7      | 1      |
| NAP-2                     | 6      | 1      |
| NGF R                     | 13     | 53,169 |
| NRG-I-b1                  | 1      | 1      |
| NT-3                      | 29     | 255    |
| NT-4                      | 19     | 20     |
| OBS (Obstatin-C-terminus) | 55     | 114    |
| Oncostatin M (OSM)        | 15     | 1      |
| Osteoprotegerin (OPG)     | 49     | 53,626 |
| PARC                      | 39     | 1,184  |
| P-Cadherin                | 40     | 53,627 |
| PDGF AA                   | 59     | 347    |
| PDGF AB                   | 51     | 256    |
| PDGF BB                   | 36     | 1      |
| PDGF R alpha              | 33     | 1      |
| PDGF R beta               | 1      | 1      |
| PECAM-1 (CD31)            | 1      | 52     |
| PF-4                      | 30     | 95     |
| PIGF                      | 5      | 1      |
| Prolactin                 | 16     | 44     |
| P-selectin                | 4      | 1      |
| RAGE                      | 21     | 142    |
| Rantes                    | 1      | 2      |
| SAA                       | 7      | 4      |
| SCF                       | 18     | 1      |
| SCF R                     | 14     | 11     |
| SDF-1a                    | 8      | 1      |
| SDF-1b                    | 5      | 1      |
| Shh-N                     | 7      | 4,115  |
| Siglec-5                  | 9      | 126    |
| Siglec-9                  | 19     | 1      |
| ST2 (IL-1R4)              | 17     | 53,300 |
| TARC                      | 8      | 1      |
| TECK                      | 8      | 182    |
| TGF-a                     | 4      | 17     |
| TGF-beta 1                | 161    | 654    |
| TGF-beta 2                | 30     | 42     |
| TGF-beta 3                | 35     | 1      |
| Tie-1                     | 56     | 53,027 |
| Tie-2                     | 23     | 49,197 |
| Timp-1                    | 24     | 1      |
| Timp-2                    | 12     | 60     |
| Timp-3                    | 10,617 | 27,745 |
| Timp-4                    | 34     | 184    |
| TNF-a                     | 26     | 8      |
| TNF-b                     | 8      | 33     |
| TNF-R I                   | 9      | 1      |
| TNF-R II                  | 5      | 10     |
| TPO                       | 5      | 4      |
| TRAIL                     | 1      | 50     |
| TRAIL R1                  | 1      | 53,211 |
| TRAIL R2                  | 1      | 53,348 |
| TRAIL R3                  | 1      | 3,498  |
| TRAIL R4                  | 14     | 53,543 |

|              |    |        |
|--------------|----|--------|
| TRANCE       | 1  | 2,021  |
| TREM-1       | 1  | 59     |
| TROY         | 1  | 358    |
| u PAR        | 1  | 1      |
| ubiquitin+1  | 1  | 50,906 |
| VCAM-1       | 1  | 96     |
| VE- Cadherin | 1  | 5,036  |
| VEGF         | 2  | 1,161  |
| VEGF R2      | 11 | 51,783 |
| VEGF R3      | 4  | 6,518  |
| VEGF-D       | 5  | 135    |
| VEGI         | 1  | 1      |
